# Supplementary material
Source: PubMed Central journal article supplement (PMC7427556)
Supplement: mmc2.pdf [file mmc2.pdf]

**Table S2. Predicted SARS-COV-2-derived CD8<sup>+</sup> T cell epitopes with predicted binding affinities for HLA-A\*02:01 or HLA-B\*07:02. Related to STAR Methods.**

| HLA restriction | Peptide sequence  | Position | Protein  | Score_EL | %Rank_EL | Predicted binding level |
|-----------------|-------------------|----------|----------|----------|----------|-------------------------|
| A*02:01         | <b>YLQPRTFLL*</b> | 269      | Spike    | 0.972695 | 0.013    | SB                      |
| A*02:01         | <b>VLNDILSRL</b>  | 976      | Spike    | 0.946683 | 0.026    | SB                      |
| A*02:01         | <b>TLDSKTQSL*</b> | 109      | Spike    | 0.912308 | 0.047    | SB                      |
| A*02:01         | KIADYNYKL         | 417      | Spike    | 0.859823 | 0.074    | SB                      |
| A*02:01         | RLDKVEAEV         | 983      | Spike    | 0.850121 | 0.081    | SB                      |
| A*02:01         | RLQSLQTYV         | 1000     | Spike    | 0.849935 | 0.081    | SB                      |
| A*02:01         | LLFNKVTLA         | 821      | Spike    | 0.808857 | 0.105    | SB                      |
| A*02:01         | HLMSFPQSA         | 1048     | Spike    | 0.79447  | 0.113    | SB                      |
| A*02:01         | VVFLHVTYV         | 1060     | Spike    | 0.755669 | 0.144    | SB                      |
| A*02:01         | FIAGLIAIV         | 1220     | Spike    | 0.666712 | 0.227    | SB                      |
| B*07:02         | <b>SPRRARVA</b>   | 680      | Spike    | 0.899954 | 0.065    | SB                      |
| B*07:02         | <b>GPCKSTNLV</b>  | 526      | Spike    | 0.610435 | 0.275    | SB                      |
| B*07:02         | TPINLVRDL         | 208      | Spike    | 0.572539 | 0.306    | SB                      |
| B*07:02         | EPVLKGVKL         | 1262     | Spike    | 0.564515 | 0.314    | SB                      |
| B*07:02         | QPTESIVRF         | 321      | Spike    | 0.502738 | 0.376    | SB                      |
| B*07:02         | FPQSAPHGV         | 1052     | Spike    | 0.499604 | 0.379    | SB                      |
| B*07:02         | IPTNFTISV         | 714      | Spike    | 0.462356 | 0.423    | SB                      |
| B*07:02         | LPPAYTNSF         | 24       | Spike    | 0.438154 | 0.458    | SB                      |
| B*07:02         | KPFERDIST         | 462      | Spike    | 0.353815 | 0.581    | WB                      |
| A*02:01         | <b>SLVKPSFYV</b>  | 50       | Envelope | 0.854221 | 0.078    | SB                      |
| A*02:01         | FLAFVVFLL         | 20       | Envelope | 0.525237 | 0.375    | SB                      |
| A*02:01         | YVYSRVKKNL        | 57       | Envelope | 0.466076 | 0.447    | SB                      |
| A*02:01         | TLIVNSVLL         | 11       | Envelope | 0.381795 | 0.581    | WB                      |
| A*02:01         | IVNSVLLFL         | 13       | Envelope | 0.309928 | 0.763    | WB                      |
| A*02:01         | FVSEETGTL         | 4        | Envelope | 0.299631 | 0.792    | WB                      |
| A*02:01         | FLLVTLAIL         | 26       | Envelope | 0.282764 | 0.843    | WB                      |
| A*02:01         | SVLLFLAFV         | 16       | Envelope | 0.219388 | 1.07     | WB                      |
| A*02:01         | VLLFLAFVV         | 17       | Envelope | 0.144104 | 1.489    | WB                      |
| A*02:01         | VTLAILTAL         | 29       | Envelope | 0.090004 | 2.081    | NA                      |
| B*07:02         | YVYSRVKKNL        | 57       | Envelope | 0.144188 | 1.153    | WB                      |
| B*07:02         | NVSLVKPSF         | 48       | Envelope | 0.051477 | 2.218    | NA                      |
| B*07:02         | FVSEETGTL         | 4        | Envelope | 0.050757 | 2.235    | NA                      |
| B*07:02         | VTLAILTAL         | 29       | Envelope | 0.015086 | 4.148    | NA                      |
| B*07:02         | KPSFYVYSR         | 53       | Envelope | 0.011733 | 4.704    | NA                      |
| B*07:02         | SSRVPDLLV         | 67       | Envelope | 0.008558 | 5.489    | NA                      |
| B*07:02         | IVNSVLLFL         | 13       | Envelope | 0.008508 | 5.503    | NA                      |
| B*07:02         | LAILTALRL         | 31       | Envelope | 0.008031 | 5.668    | NA                      |
| B*07:02         | FVVFLLVTL         | 23       | Envelope | 0.005874 | 6.532    | NA                      |
| B*07:02         | LVKPSFYVY         | 51       | Envelope | 0.005264 | 6.88     | NA                      |
| A*02:01         | <b>KLLEQWNLV</b>  | 15       | Membrane | 0.898887 | 0.053    | SB                      |
| A*02:01         | FVLAAYRI          | 65       | Membrane | 0.49427  | 0.409    | SB                      |
| A*02:01         | SMWSFNPET         | 108      | Membrane | 0.460519 | 0.454    | SB                      |
| A*02:01         | GLMWLSYFI         | 89       | Membrane | 0.441625 | 0.48     | SB                      |
| A*02:01         | LLWPVTLAC         | 56       | Membrane | 0.230705 | 1.023    | WB                      |
| A*02:01         | WLLWPVTLA         | 55       | Membrane | 0.213384 | 1.095    | WB                      |
| A*02:01         | RLFARTRSM         | 101      | Membrane | 0.167886 | 1.323    | WB                      |
| A*02:01         | FLFLTWICL         | 26       | Membrane | 0.142011 | 1.503    | WB                      |
| A*02:01         | FIASFRLFA         | 96       | Membrane | 0.141834 | 1.504    | WB                      |
| A*02:01         | TLACFVLAA         | 61       | Membrane | 0.128495 | 1.59     | WB                      |
| B*07:02         | LPKEITVAT         | 164      | Membrane | 0.46273  | 0.423    | SB                      |
| B*07:02         | HLRIAGHHL         | 148      | Membrane | 0.370087 | 0.557    | WB                      |
| B*07:02         | RLFARTRSM         | 101      | Membrane | 0.333256 | 0.615    | WB                      |
| B*07:02         | RPLLESELV         | 131      | Membrane | 0.136447 | 1.195    | WB                      |

|         |                   |     |              |          |       |    |
|---------|-------------------|-----|--------------|----------|-------|----|
| B*07:02 | NVPLHGTL          | 121 | Membrane     | 0.053044 | 2.18  | NA |
| B*07:02 | VPLHGILT          | 122 | Membrane     | 0.047466 | 2.314 | NA |
| B*07:02 | FAYANRNR          | 37  | Membrane     | 0.039055 | 2.53  | NA |
| B*07:02 | ITVATSR           | 168 | Membrane     | 0.028244 | 3.013 | NA |
| B*07:02 | GAVILRGHL         | 141 | Membrane     | 0.025424 | 3.198 | NA |
| B*07:02 | SFNPETNIL         | 111 | Membrane     | 0.022685 | 3.378 | NA |
| A*02:01 | <b>LLDRLNQL*</b>  | 222 | Nucleocapsid | 0.951445 | 0.024 | SB |
| A*02:01 | KLDDKDPNF         | 338 | Nucleocapsid | 0.559155 | 0.339 | SB |
| A*02:01 | GMSRIGMEV         | 316 | Nucleocapsid | 0.409317 | 0.531 | WB |
| A*02:01 | LQLPQGTTL         | 159 | Nucleocapsid | 0.219198 | 1.071 | WB |
| A*02:01 | DLDDFSKQL         | 399 | Nucleocapsid | 0.191364 | 1.197 | WB |
| A*02:01 | AQFAPSASA         | 305 | Nucleocapsid | 0.17815  | 1.264 | WB |
| A*02:01 | RLNQLESKM         | 226 | Nucleocapsid | 0.116993 | 1.704 | WB |
| A*02:01 | ILLNKHIDA         | 351 | Nucleocapsid | 0.112742 | 1.751 | WB |
| A*02:01 | TTLPKGFYA         | 165 | Nucleocapsid | 0.092237 | 2.041 | NA |
| A*02:01 | RTATKAYNV         | 262 | Nucleocapsid | 0.085053 | 2.169 | NA |
| B*07:02 | <b>FPRGQGVPI</b>  | 66  | Nucleocapsid | 0.970857 | 0.019 | SB |
| B*07:02 | <b>KPRQKRTAT</b>  | 257 | Nucleocapsid | 0.845878 | 0.1   | SB |
| B*07:02 | <b>SPRWYFYFL*</b> | 105 | Nucleocapsid | 0.78941  | 0.139 | SB |
| B*07:02 | LPNNTASWF         | 45  | Nucleocapsid | 0.281028 | 0.716 | WB |
| B*07:02 | RIRGGDGKM         | 93  | Nucleocapsid | 0.277615 | 0.723 | WB |
| B*07:02 | GPEQTQGNF         | 278 | Nucleocapsid | 0.250908 | 0.777 | WB |
| B*07:02 | RPQGLPNNT         | 41  | Nucleocapsid | 0.236468 | 0.809 | WB |
| B*07:02 | TPSGTWLTY         | 325 | Nucleocapsid | 0.199278 | 0.917 | WB |
| B*07:02 | KAYNVTQAF         | 266 | Nucleocapsid | 0.196035 | 0.929 | WB |
| B*07:02 | APRITFGGP         | 12  | Nucleocapsid | 0.14837  | 1.13  | WB |
| A*02:01 | <b>LLYDANYFL</b>  | 139 | ORF3A        | 0.967105 | 0.017 | SB |
| A*02:01 | <b>ALSKGVHFV</b>  | 72  | ORF3A        | 0.94978  | 0.024 | SB |
| A*02:01 | TVYSHLLLV         | 89  | ORF3A        | 0.85148  | 0.08  | SB |
| A*02:01 | YLYALVYFL         | 107 | ORF3A        | 0.830503 | 0.093 | SB |
| A*02:01 | IVDEPEEHV         | 236 | ORF3A        | 0.617627 | 0.277 | SB |
| A*02:01 | ALLAVFQSA         | 51  | ORF3A        | 0.590547 | 0.306 | SB |
| A*02:01 | ALVYFLQSI         | 110 | ORF3A        | 0.540919 | 0.358 | SB |
| A*02:01 | GLEAPFLYL         | 100 | ORF3A        | 0.478119 | 0.431 | SB |
| A*02:01 | NLLLLFVTV         | 82  | ORF3A        | 0.361087 | 0.626 | WB |
| A*02:01 | ATIPIQASL         | 33  | ORF3A        | 0.315224 | 0.748 | WB |
| B*07:02 | IPIQASLPF         | 35  | ORF3A        | 0.773507 | 0.149 | SB |
| B*07:02 | APFLYLYAL         | 103 | ORF3A        | 0.621391 | 0.266 | SB |
| B*07:02 | ATIPIQASL         | 33  | ORF3A        | 0.188654 | 0.956 | WB |
| B*07:02 | TPSDFVRAT         | 24  | ORF3A        | 0.163307 | 1.058 | WB |
| B*07:02 | IPYNSVTSS         | 158 | ORF3A        | 0.117318 | 1.326 | WB |
| B*07:02 | QSASKIITL         | 57  | ORF3A        | 0.082125 | 1.67  | WB |
| B*07:02 | SINFVRIIM         | 117 | ORF3A        | 0.079894 | 1.698 | WB |
| B*07:02 | KCRSKNPLL         | 132 | ORF3A        | 0.057908 | 2.063 | NA |
| B*07:02 | ITLKKRWQL         | 63  | ORF3A        | 0.041058 | 2.468 | NA |
| B*07:02 | LALSKGVHF         | 71  | ORF3A        | 0.019844 | 3.604 | NA |
| A*02:01 | <b>HLVDFQVTI</b>  | 3   | ORF6         | 0.925606 | 0.039 | SB |
| A*02:01 | NLDYIINLI         | 28  | ORF6         | 0.408601 | 0.532 | WB |
| A*02:01 | TIAEILLI          | 10  | ORF6         | 0.255021 | 0.933 | WB |
| A*02:01 | LIIMRTFKV         | 16  | ORF6         | 0.184755 | 1.23  | WB |
| A*02:01 | SIWNLDYII         | 25  | ORF6         | 0.11402  | 1.737 | WB |
| A*02:01 | VTIAEILLI         | 9   | ORF6         | 0.095616 | 1.983 | WB |
| A*02:01 | SQLDEEQPM         | 50  | ORF6         | 0.075866 | 2.332 | NA |
| A*02:01 | FQVTIAEIL         | 7   | ORF6         | 0.067993 | 2.472 | NA |
| A*02:01 | IINLIKNL          | 32  | ORF6         | 0.053716 | 2.858 | NA |
| A*02:01 | IMRTFKVSI         | 18  | ORF6         | 0.026191 | 4.225 | NA |
| B*07:02 | IKNLSKSL          | 36  | ORF6         | 0.230076 | 0.827 | WB |
| B*07:02 | IMRTFKVSI         | 18  | ORF6         | 0.022604 | 3.383 | NA |
| B*07:02 | LTENKYSQL         | 44  | ORF6         | 0.015514 | 4.085 | NA |

|         |            |     |       |          |        |    |
|---------|------------|-----|-------|----------|--------|----|
| B*07:02 | IINLIKLN   | 32  | ORF6  | 0.006437 | 6.277  | NA |
| B*07:02 | SQLDEEQPM  | 50  | ORF6  | 0.003644 | 8.176  | NA |
| B*07:02 | HLVDFQVTI  | 3   | ORF6  | 0.002296 | 10.134 | NA |
| B*07:02 | QVTIAEILL  | 8   | ORF6  | 0.001767 | 11.395 | NA |
| B*07:02 | TFKVSINLN  | 21  | ORF6  | 0.001479 | 12.315 | NA |
| B*07:02 | IAEILLIIM  | 11  | ORF6  | 0.00144  | 12.469 | NA |
| B*07:02 | LIIMRTFKV  | 16  | ORF6  | 0.001225 | 13.379 | NA |
| A*02:01 | KLFIRQEEV  | 85  | ORF7a | 0.841044 | 0.087  | SB |
| A*02:01 | ELYSPIFLI  | 95  | ORF7a | 0.549733 | 0.349  | SB |
| A*02:01 | ILFLALITL  | 4   | ORF7a | 0.509315 | 0.391  | SB |
| A*02:01 | ELYHYQECV  | 16  | ORF7a | 0.229441 | 1.028  | WB |
| A*02:01 | FLALITLAT  | 6   | ORF7a | 0.1286   | 1.589  | WB |
| A*02:01 | PLADNKFAL  | 48  | ORF7a | 0.099037 | 1.928  | WB |
| A*02:01 | FAFACPDGV  | 63  | ORF7a | 0.092682 | 2.033  | NA |
| A*02:01 | KIILFLALI  | 2   | ORF7a | 0.04918  | 2.985  | NA |
| A*02:01 | LIVAAIVFI  | 102 | ORF7a | 0.046974 | 3.069  | NA |
| A*02:01 | VAAIVFITL  | 104 | ORF7a | 0.021317 | 4.671  | NA |
| B*07:02 | RARSVSPKL  | 78  | ORF7a | 0.809781 | 0.125  | SB |
| B*07:02 | SPIFLIVAA  | 98  | ORF7a | 0.261097 | 0.757  | SB |
| B*07:02 | CPDGVKHVY  | 67  | ORF7a | 0.147393 | 1.135  | WB |
| B*07:02 | CVRGTTVLL  | 23  | ORF7a | 0.122408 | 1.289  | WB |
| B*07:02 | EGNSPFHPL  | 41  | ORF7a | 0.072505 | 1.795  | WB |
| B*07:02 | SPKLFIRQE  | 83  | ORF7a | 0.044726 | 2.38   | NA |
| B*07:02 | VAAIVFITL  | 104 | ORF7a | 0.02756  | 3.058  | NA |
| B*07:02 | HPLADNKFA  | 47  | ORF7a | 0.025196 | 3.213  | NA |
| B*07:02 | GTYEGNSPF  | 38  | ORF7a | 0.023104 | 3.351  | NA |
| A*02:01 | YIDIGNYTV  | 73  | ORF8  | 0.854638 | 0.078  | SB |
| A*02:01 | FLEYHDVRV  | 108 | ORF8  | 0.673457 | 0.221  | SB |
| A*02:01 | KLGLSLVRC  | 94  | ORF8  | 0.278824 | 0.855  | WB |
| A*02:01 | YVDDPCPI   | 31  | ORF8  | 0.202898 | 1.143  | WB |
| A*02:01 | FLGIITVA   | 6   | ORF8  | 0.193424 | 1.187  | WB |
| A*02:01 | VFLGIITV   | 5   | ORF8  | 0.152288 | 1.434  | WB |
| A*02:01 | LVFLGIIT   | 4   | ORF8  | 0.035592 | 3.564  | NB |
| A*02:01 | TVSCLPFTI  | 80  | ORF8  | 0.029176 | 3.988  | NB |
| A*02:01 | TINCQEPKL  | 87  | ORF8  | 0.02236  | 4.549  | NB |
| A*02:01 | SCTQHQPYPV | 24  | ORF8  | 0.02063  | 4.752  | NB |
| B*07:02 | EPKLGSLVV  | 92  | ORF8  | 0.397295 | 0.516  | WB |
| B*07:02 | RKSAPLIEL  | 52  | ORF8  | 0.029648 | 2.947  | NB |
| B*07:02 | VGARKSAPL  | 49  | ORF8  | 0.028093 | 3.023  | NB |
| B*07:02 | GARKSAPLI  | 50  | ORF8  | 0.02662  | 3.12   | NB |
| B*07:02 | AAFHQECSL  | 14  | ORF8  | 0.02525  | 3.21   | NB |
| B*07:02 | EYHDVRVVL  | 110 | ORF8  | 0.020104 | 3.576  | NB |
| B*07:02 | CPIHFYSKW  | 37  | ORF8  | 0.01498  | 4.164  | NB |
| B*07:02 | YIDIGNYTV  | 73  | ORF8  | 0.011096 | 4.836  | NB |
| B*07:02 | GIITTVAAF  | 8   | ORF8  | 0.007836 | 5.735  | NB |
| B*07:02 | CQEPKLGSL  | 90  | ORF8  | 0.007647 | 5.8    | NB |

SARS-COV-2-derived CD8<sup>+</sup> T cell epitopes were predicted using NetMHCpan version 4.1. SB: strong binder (% Rank < 0.5). WB: weak binder (% Rank < 2.00). Peptides selected for tetramer-based analyses are highlighted in bold font. Peptides that elicited positive responses are denoted with asterisks.

**Table S3. Donor characteristics. Related to STAR Methods.**

|                                                                | Severe Acute<br>(n = 17) | Mild Acute<br>(n = 10) | Severe<br>convalescent<br>(n = 26) | Mild convalescent<br>(n = 40) | Exposed relatives<br>(n = 30) | 2020<br>blood donors<br>(n = 55) | 2019<br>blood donors<br>(n = 28) |
|----------------------------------------------------------------|--------------------------|------------------------|------------------------------------|-------------------------------|-------------------------------|----------------------------------|----------------------------------|
| Age<br>(median, years)                                         | 58                       | 52                     | 51                                 | 51                            | 42                            | n/d                              | n/d                              |
| Gender<br>(% male/female)                                      | 82/18                    | 70/30                  | 88/12                              | 45/55                         | 33/67                         | n/d                              | n/d                              |
| History of travel                                              | n/d                      | n/d                    | 33%                                | 85%<br>(79% Italy)            | 33%<br>(100% Italy)           | n/d                              | n/d                              |
| BMI<br>(median)                                                | 32                       | 28                     | 28                                 | 24                            | n/d                           | n/d                              | n/d                              |
| Smoker                                                         | 44%<br>(7/16)            | 40%<br>(2/5)           | 38%<br>(past/now)                  | 23%<br>(past/now)             | n/d                           | n/d                              | n/d                              |
| Diabetes                                                       | 29%                      | 30%                    | 35%                                | 10%                           | 0%                            | n/d                              | n/d                              |
| Hypertension                                                   | 35%                      | 20%                    | 42%                                | 15%                           | 0.7%                          | n/d                              | n/d                              |
| Other chronic diseases                                         | 71%                      | 50%                    | 19%                                | 15%                           | 17%                           | n/d                              | n/d                              |
| PCR<br>positivity                                              | 100%                     | 100%                   | 100%                               | 100%                          | n/d                           | n/d                              | n/d                              |
| Viremia at time of sampling                                    | 47%                      | 40%                    | n/d                                | n/d                           | n/d                           | n/d                              | n/d                              |
| Time from debut of symptom to<br>sampling (median +-IQR, days) | 14 (12-17)               | 14 (11-14)             | 52 (42-58)                         | 55 (49-64)                    | n/d                           | n/d                              | n/d                              |
| Time from symptom free to<br>sampling (median +-IQR, days)     | n/d                      | n/d                    | 13 (3-21)                          | 39 (25-53)                    | n/d                           | n/d                              | n/d                              |
| Asymptomatic                                                   | 0%                       | 0%                     | 0%                                 | 0%                            | 21%                           | n/d                              | n/d                              |
| Outcome                                                        | 76%<br>alive             | 100%<br>alive          | 100% alive                         | 100% alive                    | 100% alive                    | n/d                              | n/d                              |
| Antibody positivity                                            | 82%                      | 50%                    | 100%                               | 85%                           | 64%                           | n/d                              | n/d                              |

BMI: body mass index (18.5-24.5 normal; 25-29.9 overweight; >30 obesity); n/d: not determined.

**Table S4. Breakdown of samples used in each assay by group. Related to STAR Methods.**

|                            | <b>Phenotype</b> | <b>Tetramer</b> | <b>Function</b> | <b>Proliferation</b> | <b>Activation</b> | <b>ELISpot</b> | <b>Serology</b> | <b>Inflammation</b> |
|----------------------------|------------------|-----------------|-----------------|----------------------|-------------------|----------------|-----------------|---------------------|
| <b>Acute severe</b>        | 17/17            | 17/17           | 3/17            |                      | 3/17              |                | 17/17           | 17/17               |
| <b>Severe convalescent</b> | 26/26            | 26/26           | 26/26           | 26/26                | 4/26              | 22/26          | 23/26           |                     |
| <b>Acute moderate</b>      | 10/10            | 10/10           | 3/10            |                      | 3/10              |                | 10/10           | 10/10               |
| <b>Mild convalescent</b>   | 40/40            | 40/40           | 40/40           | 40/40                | 2/40              | 30/40          | 31/40           |                     |
| <b>Exposed relatives</b>   | 30/30            | 30/30           | 30/30           | 30/30                | 8/30              | 29/30          | 28/30           |                     |
| <b>2020 blood donors</b>   | 24/55            | 24/55           | 31/55           | 31/55                | 6/55              | 25/55          | 25/55           | 24/55               |
| <b>2019 blood donors</b>   |                  |                 | 28/28           | 28/28                |                   | 24/28          |                 |                     |
