# Supplementary material
Source: PubMed Central journal article supplement (PMC7427556)
Supplement: mmc3.pdf [file mmc3.pdf]

## **Karolinska COVID-19 Study Group**

<sup>1</sup>Mira Akber, <sup>3</sup>Soo Aleman, <sup>1</sup>Lena Berglin, <sup>1</sup>Helena Bergsten, <sup>1</sup>Niklas K Björkström, <sup>1</sup>Susanna Brighenti, <sup>1</sup>Demi Brownlie, <sup>1</sup>Marcus Buggert, <sup>1</sup>Marta Butrym, <sup>1</sup>Benedict Chambers, <sup>1</sup>Puran Chen, <sup>1</sup>Martin Cornillet Jeannin, <sup>3</sup>Jonathan Grip, <sup>1</sup>Angelica Cuapio Gomez, <sup>2</sup>Lena Dillner, <sup>1</sup>Jean-Baptiste Gorin, <sup>1</sup>Isabel Diaz Lozano, <sup>1</sup>Majda Dzidic, <sup>1</sup>Johanna Emgård, <sup>3</sup>Lars I Eriksson, <sup>1</sup>Malin Flodström Tullberg, <sup>2</sup>Anna Färnert, <sup>2</sup>Hedvig Glans, <sup>1</sup>Sara Gredmark Russ, <sup>1</sup>Alvaro Haroun-Izquierdo, <sup>1</sup>Elizabeth Henriksson, <sup>1</sup>Laura Hertwig, <sup>1</sup>Sadaf Kalsum, <sup>2</sup>Habiba Kamal, <sup>1</sup>Tobias Kamann, <sup>1</sup>Jonas Klingstrom, <sup>1</sup>Efthymia Kokkinou, <sup>1</sup>Egle Kvedaraite, <sup>1</sup>Hans-Gustaf Ljunggren, <sup>2</sup>Sian Llewellyn-Lacey, <sup>1</sup>Marco Loreti, <sup>1</sup>Magalini Lourda, <sup>1</sup>Kimia Maleki, <sup>1</sup>Karl- Johan Malmberg, <sup>1</sup>Nicole Marquardt, <sup>1</sup>Christopher Maucourant, <sup>1</sup>Jakob Michaelsson, <sup>1</sup>Jenny Mjösberg, <sup>1</sup>Kirsten Moll, <sup>1</sup>Jagadees Muva, <sup>3</sup>Johan Mårtensson, <sup>2</sup>Pontus Naulé, <sup>1</sup>Anna Norrby-Teglund, <sup>2</sup>Annika Olsson, <sup>1</sup>Laura Palma Medina, <sup>1</sup>Tiphaine Parrot, <sup>3</sup>Björn Persson, <sup>1</sup>André Perez-Potti, <sup>1</sup>Lena Radler, <sup>1</sup>Emma Ringqvist, <sup>1</sup>Olga Rivera-Ballesteros, <sup>3</sup>Olav Rooyackers, <sup>1</sup>Johan Sandberg, <sup>1</sup>John Tyler Sandberg, <sup>1</sup>Takuya Sekine, <sup>1</sup>Ebba Sohlberg, <sup>1</sup>Tea Soini, <sup>2</sup>Kristoffer Strålin, <sup>2</sup>Anders Sönnernborg, <sup>1</sup>Mattias Svensson, <sup>1</sup>Janne Tynell, <sup>1</sup>Renata Varnaite, <sup>1</sup>Andreas Von Kries, <sup>4</sup>Christian Unge, <sup>1</sup>David Wulliman.

<sup>1</sup>Center for Infectious Medicine, Department of Medicine Huddinge, Karolinska Institutet, Karolinska University Hospital, Stockholm, Sweden.

<sup>2</sup>Division of Infectious Diseases and Dermatology, Karolinska University Hospital and Department of Medicine Huddinge, Stockholm, Sweden.

<sup>3</sup>Function Perioperative Medicine and Intensive Care, Karolinska University Hospital, Stockholm, Sweden.

<sup>4</sup>Department of Emergency Medicine, Karolinska University Hospital, Stockholm, Sweden
